# Supplementary figures and images for: Ordered mesoporous silica (SBA-15) derivatized with imidazole-containing functionalities as a selective adsorbent of precious metal ionsElectronic supplementary information (ESI) available: TEM image of SBA-15. See http://www.rsc.org/suppdata/jm/b3/b315829b/
Source: Royal Society of Chemistry journal article supplement (doi:10.1039/b315829b), 2004-01-01

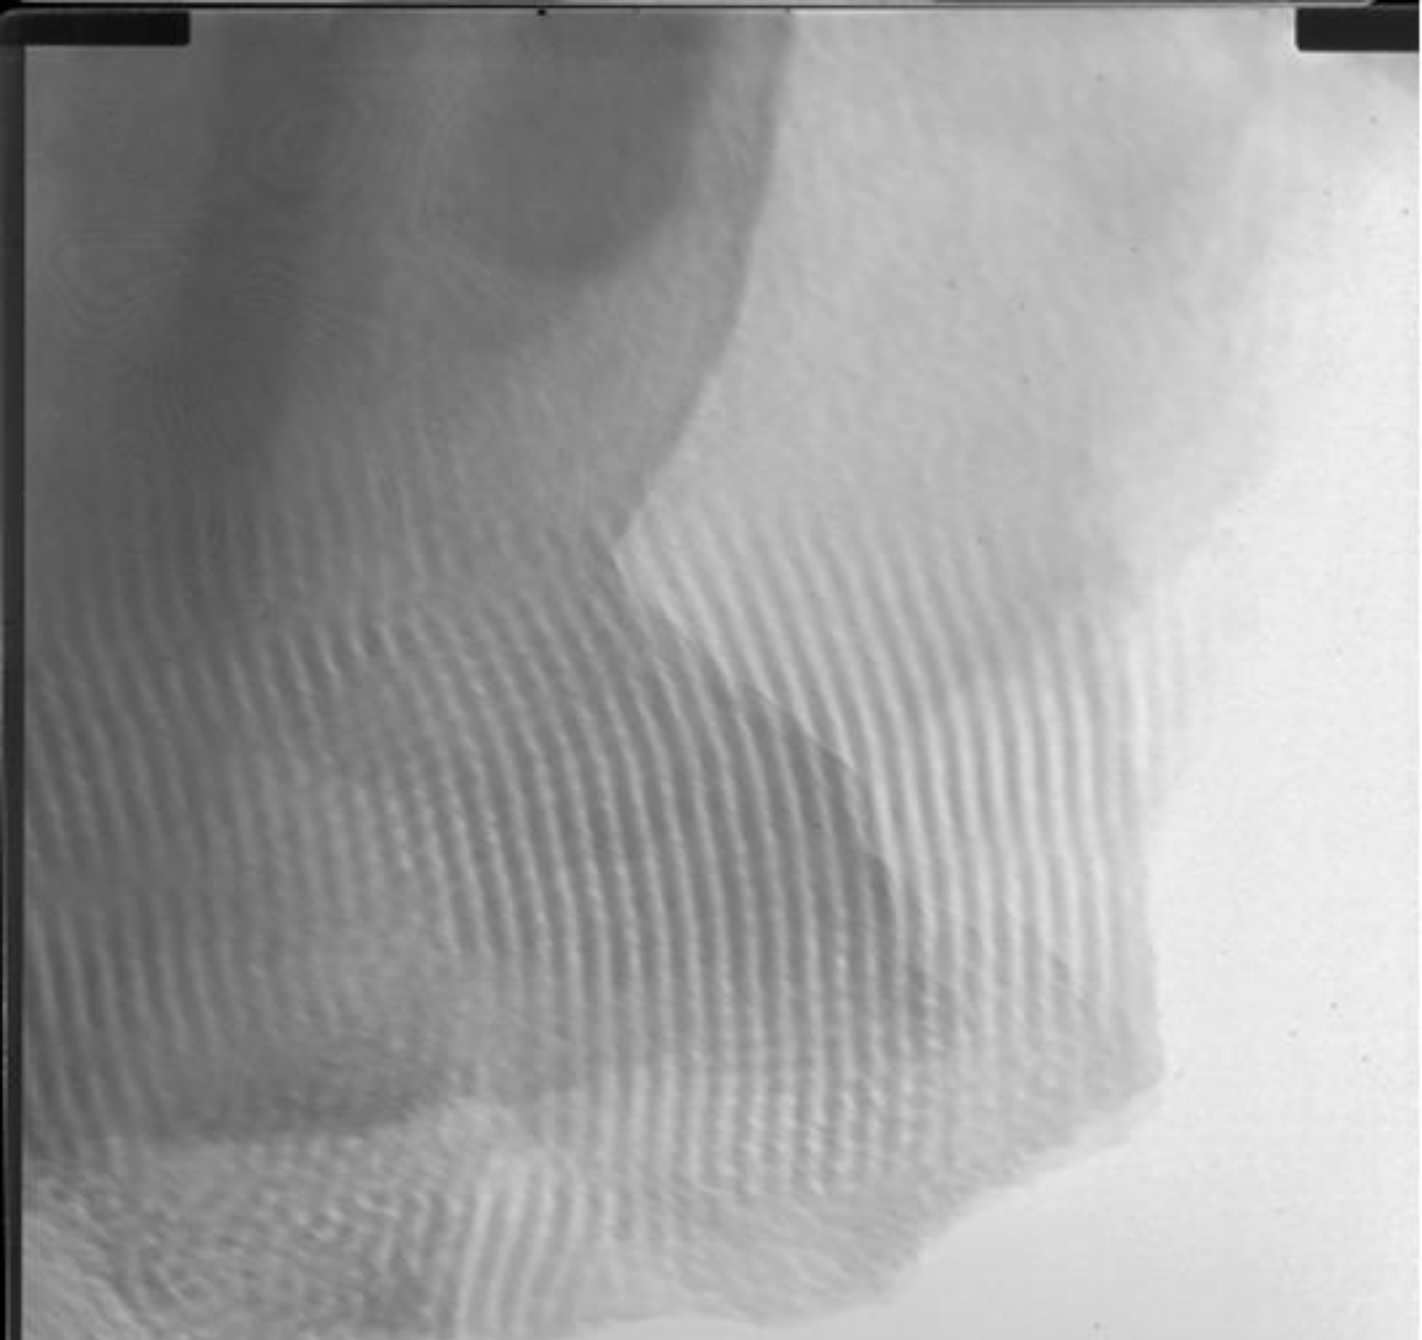

R2  
EM9296 200.0KV X200K 20nm

Supplement: b315829b.pdf [file b315829b.pdf]
